# Supplementary material for: Origin of hydrogen evolution activity on MS2 (M = Mo or Nb) monolayers
Source: Royal Society of Chemistry journal article supplement (doi:10.1039/c5ta02817e), 2015-01-01
Supplement: c5ta02817e1.pdf [file c5ta02817e1.pdf]

## Supplementary Information: Origin of hydrogen evolution activity on MS<sub>2</sub> (M = Mo or Nb) monolayers

Xiaobo Chen,<sup>\*a</sup> Yu Gu,<sup>a</sup> Guohua Tao,<sup>b</sup> Yanli Pei,<sup>c</sup> Guangjin Wang,<sup>d</sup> and Ni Cui<sup>a</sup>

<sup>a</sup>Department of Physics and Siyuan Laboratory, College of Science and Engineering, Jinan University, Guangzhou 510632, China.

<sup>b</sup>Shenzhen Key Laboratory of New Energy Materials by Design, Peking University, Shenzhen 518055, China.

<sup>c</sup>State Key Lab of Optoelectronics Materials & Technologies, School of Physics & Engineering, Sun Yat-Sen University, Guangzhou 510275, China.

<sup>d</sup>College of Chemistry and Materials Science, Hubei Engineering University, Xiaogan 432000, China.

## 1. Data for verification of the PES method

Table S1. Total energies for a 1H-NbS<sub>2</sub> monolayer ( $E(\text{Mo}_{10}\text{S}_{30})$ ) and its hydrogenated counterpart ( $E(\text{Mo}_{10}\text{S}_{30}\text{H})$ ) with 1/8 H coverage.  $\Delta E_{\text{H}}$  is calculated using Eq. (1).  $E'_{\text{ea}}$  and  $E'_{\text{pa}}$  are calculated by Eq (4) and (5), respectively.  $E_{A \rightarrow E}$  can be calculated according to  $E_{A \rightarrow E} = -(E_{\text{ea}} + \varepsilon_{\text{ea}} + E_{\text{pa}} + \varepsilon_{\text{pa}})$ . For quantitatively verifying the PES model in the text, all the data are shown with 6 numbers after their decimal points.

| $E(\text{Nb}_8\text{S}_{16})$ | $E(\text{Nb}_8\text{S}_{16}\text{H}_1)$ | $E'_{\text{ea}}$ | $E'_{\text{pa}}$ | $E_{A \rightarrow E}$ | $\Delta E_{\text{H}}$ |
|-------------------------------|-----------------------------------------|------------------|------------------|-----------------------|-----------------------|
| -171.179022                   | -174.827780                             | 2.021781         | 1.626977         | -3.648758             | -3.64827              |

The difference between  $E_{A \rightarrow E}$  and  $\Delta E_{\text{H}}$  is only -0.000488 eV, indicating they are numerically equivalent. This small difference is exactly equal to  $E(\text{H})$ , *i.e.* the deviation of the VASP-calculated H atom energy from the atomic reference energy of H. As will be indicated in Table S2,  $E(\text{H})$  reflects the accuracy of the pseudopotential.

## 2. Data for $\Delta G$ calculations

Table S2. Total energies for a isolated H atom  $E(H)$ , a H atom in gas molecular state ( $E(H_2)/2$ ), and their difference  $\Delta E_{cp}$ .  $E_{ZPE}(\text{gas})$  and  $E_{ZPE}(\text{ads})$  are the zero point energies of a H atom in gas molecular state and adsorbed state, respectively. The calculated  $E_{ZPE}(\text{gas})$  is 0.145 eV, in agreement with the experimental value of 0.135 eV.<sup>1</sup>  $T\Delta S_H$  is obtained from the literature.<sup>1</sup>

|                     | $E(H)$    | $E(H_2)/2$ | $\Delta E_{cp}$ | $E_{ZPE}(\text{gas})$ | $E_{ZPE}(\text{ads})$ | $T\Delta S_H$ | $\Delta E_{ZPE} - T\Delta S_H$ |
|---------------------|-----------|------------|-----------------|-----------------------|-----------------------|---------------|--------------------------------|
| 1H-MoS <sub>2</sub> |           |            |                 |                       | 0.102                 |               | 0.161                          |
| 1T-MoS <sub>2</sub> |           |            |                 |                       | 0.098                 |               | 0.157                          |
| 1H-NbS <sub>2</sub> | -0.000488 | -3.380413  | 3.380           | 0.145                 | 0.093                 | -0.205        | 0.152                          |
| 1T-NbS <sub>2</sub> |           |            |                 |                       | 0.083                 |               | 0.143                          |

Note that all the total energies in Table S1 are calculated with respect to the atomic energies in reference configuration (*i.e.* the configuration for which the pseudopotential is generated). Consequently,  $E(H)$  should be as small as possible. The small value of -0.000488 eV for  $E(H)$  indicates the high accuracy of the PAW potential. In addition, it is seen that  $E_{ZPE}(\text{ads})$  is weakly dependent on different materials.

Table S3. Structural parameters for the unit cells of all the monolayers.  $a$  and  $b$  are calculated in-plane lattice parameters.  $T$  is the vertical separation between S layers. M-S and M-M are distances between the corresponding atoms in  $MS_2$ . Previous calculation (Calc.) and experimental (Exp.) references are also included for comparison.

|                     | $a$  | $b$  | $T$  | M-S                        | M-M        |
|---------------------|------|------|------|----------------------------|------------|
| 1H-MoS <sub>2</sub> | 3.19 |      | 3.13 | 2.42                       | 3.19       |
| Exp. <sup>2</sup>   | 3.16 |      | 3.17 | 2.42                       | 3.16       |
| Calc. <sup>3</sup>  | 3.12 |      | 3.11 | 2.38                       |            |
| 1T-MoS <sub>2</sub> | 3.22 | 5.79 | 3.47 | 2.53, 2.50, 2.44,<br>2.41, | 2.81, 3.85 |
| Exp. <sup>4</sup>   | 3.22 | 5.68 |      |                            |            |
| 1H-NbS <sub>2</sub> | 3.36 |      | 3.14 | 2.49                       | 3.36       |
| Calc. <sup>5</sup>  | 3.35 |      | 3.14 | 2.49                       |            |
| 1T-NbS <sub>2</sub> | 3.39 |      | 3.09 | 2.49                       | 3.39       |

The experimental data from Ref. 2 are for the bulk 2H-MoS<sub>2</sub>.

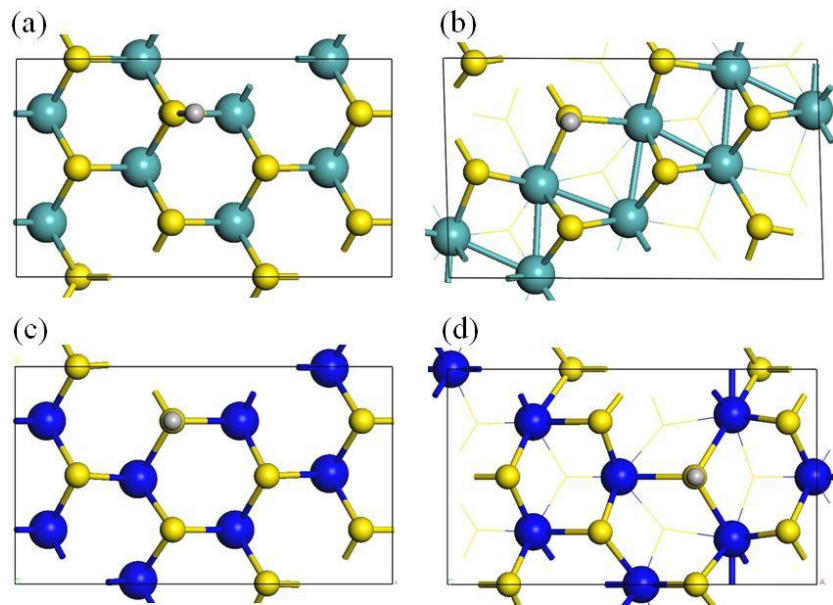

Figure S1. Top view of optimized structures for hydrogenated (a) 1H-MoS<sub>2</sub>, (b) 1T-MoS<sub>2</sub>, (c) 1H-NbS<sub>2</sub>, and (d) 1T-NbS<sub>2</sub> monolayers. All the monolayers are in the  $x$ - $y$  plane. Mo, Nb, S and H atoms are indicated by green, blue, yellow and grey balls, respectively.

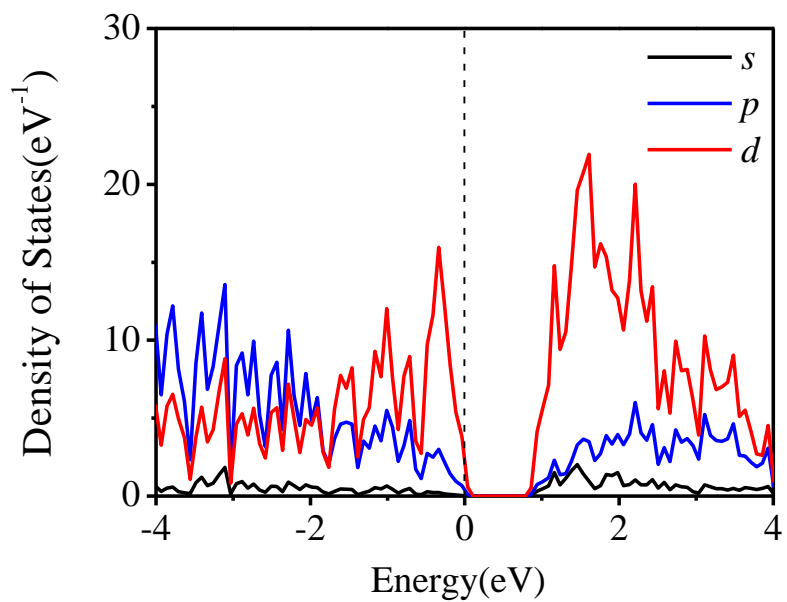

Figure S2. Projected density of states for 1T-MoS<sub>2</sub> with 100% H coverage. *s*, *p*, and *d* states are indicated by black, blue and red curves, respectively. The Fermi level is indicated by the dotted line.

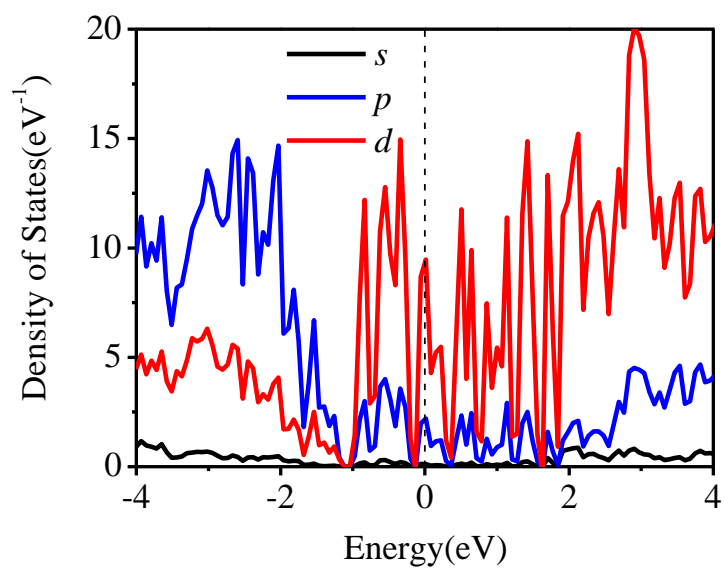

Figure S3. Projected density of states for 1T-NbS<sub>2</sub> with 75% H coverage. *s*, *p*, and *d* states are indicated by black, blue and red curves, respectively. The Fermi level is indicated by the dotted line.

## REFERENCES

1. J. K. Nørskov, T. Bligaard, A. Logadottir, J. R. Kitchin, J. G. Chen, S. Pandelov and U. Stimming, *J. Electrochem. Soc.*, 2005, **152**, J23-J26.
2. B. Schönfeld, J. J. Huang and S. C. Moss, *Acta Cryst. B*, 1983, **39**, 404-407.
3. T. Cao, G. Wang, W. Han, H. Ye, C. Zhu, J. Shi, Q. Niu, P. Tan, E. Wang, B. Liu and J. Feng, *Nat Commun*, 2012, **3**, 887.
4. R. A. Gordon, D. Yang, E. D. Crozier, D. T. Jiang and R. F. Frindt, *Phys. Rev. B*, 2002, **65**, 125407.
5. Y. Zhou, Z. Wang, P. Yang, X. Zu, L. Yang, X. Sun and F. Gao, *ACS Nano*, 2012, **6**, 9727-9736.
